# Supplementary material for: Plant community composition determines the strength of top-down control in a soil food web motif
Source: PubMed Central journal article supplement (PMC5390908; doi:10.1038/srep09134), 2015-03-16
Supplement: srep09134-s1.pdf [file srep09134-s1.pdf]

1 **Supplementary Figures**

2

3 **Plant community composition determines the strength of top down control in a soil food web motif**

4 Madhav Prakash Thakur and Nico Eisenhauer

5

6

7

8

9 .

10

11

12

13

14

15

16

17

18

19

20

21

22

23

24

25

26

27

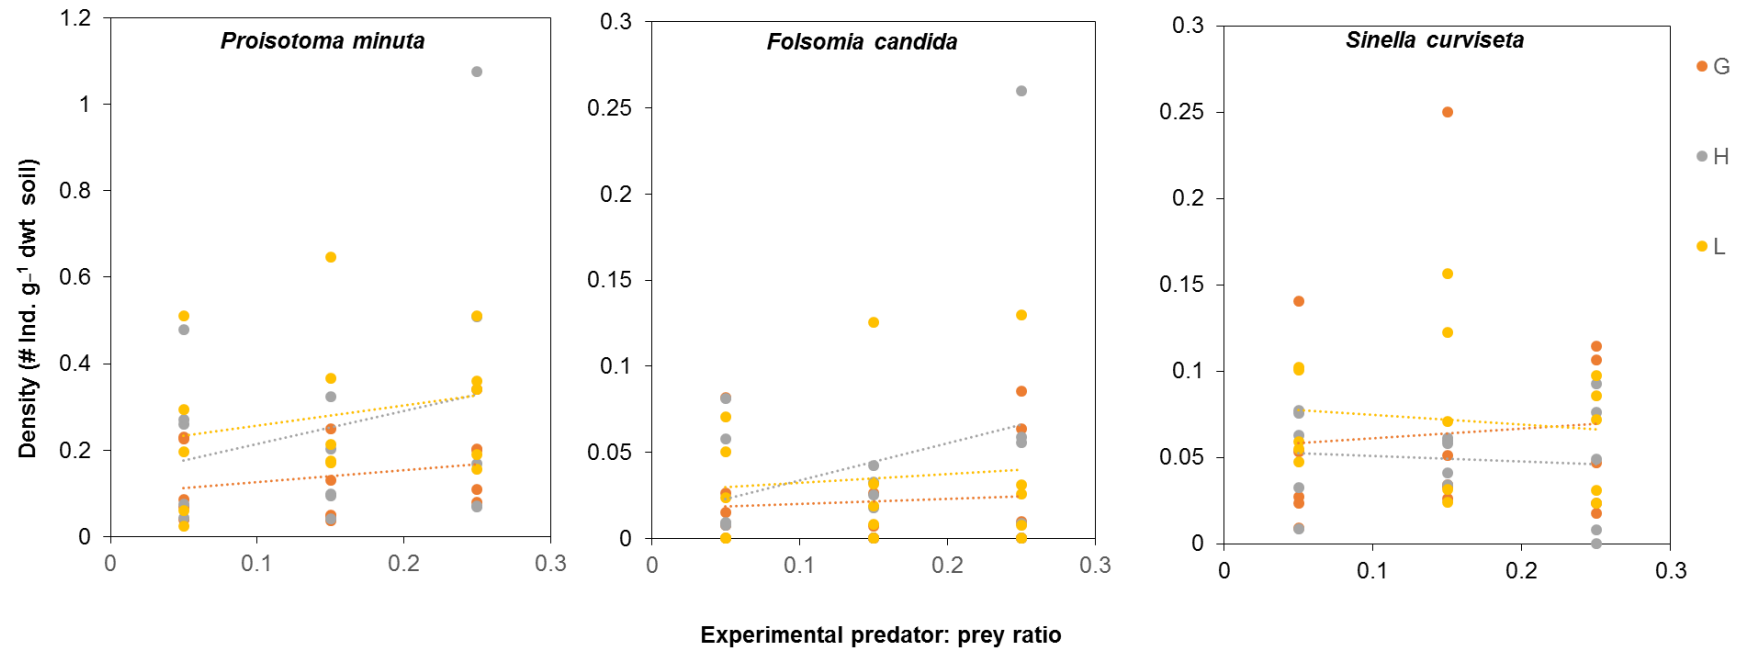

28 **Figure S1:** Species-specific responses of Collembola to increasing predator densities in different plant monocultures (H: herb monoculture, G:

29 grass monoculture, and L: legume monoculture). Using GLMM (negative binomial fits), we found no significant interaction between plant

30 monoculture communities and predator density for all three Collembola species (*Proisotoma*:  $F=0.10$ ,  $P=0.90$ ; *Folsomia*:  $F=0.32$ ,  $P=0.72$ ;

31 *Sinella*:  $F=0.16$ ,  $P=0.84$ ). Only *Proisotoma* densities were marginally significantly different among plant monocultures ( $F=2.82$ ;  $P=0.06$ )

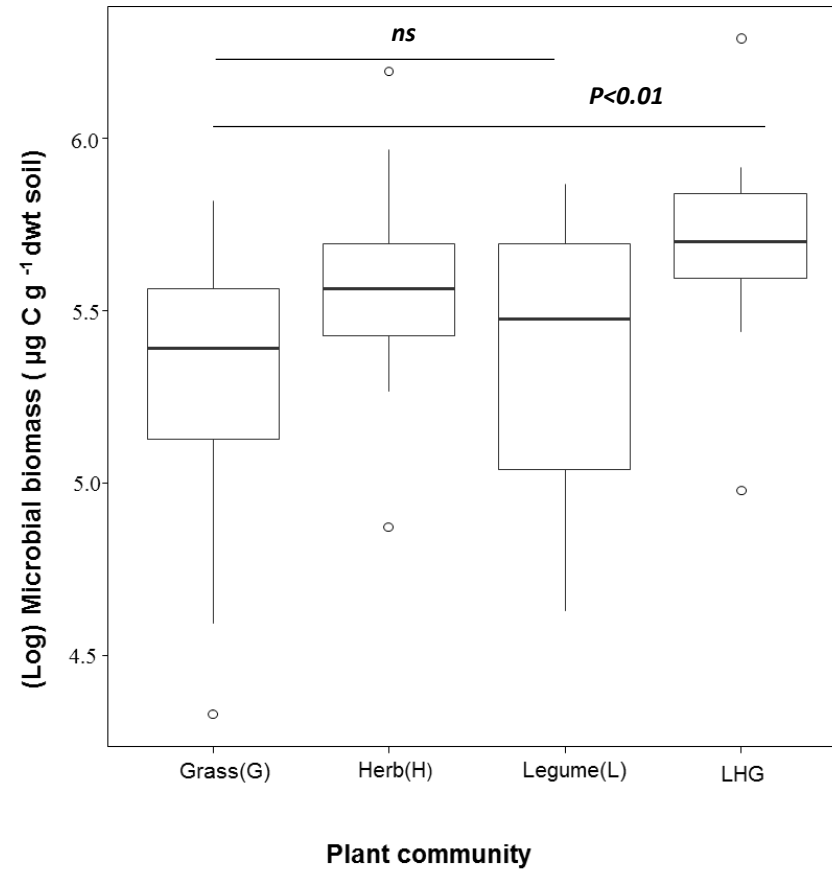

32  
33  
34  
35  
36  
37  
38  
39  
40  
41  
42  
43  
44  
45  
46

**Figure S2:** Microbial biomass C across three plant monocultures and a mixture community. Plant monocultures did not significantly differ indicated by “ns” in the figure above whereas plant mixture and plant monocultures significantly differed with higher microbial biomass C in mixture plant community (LHG).

47  
48

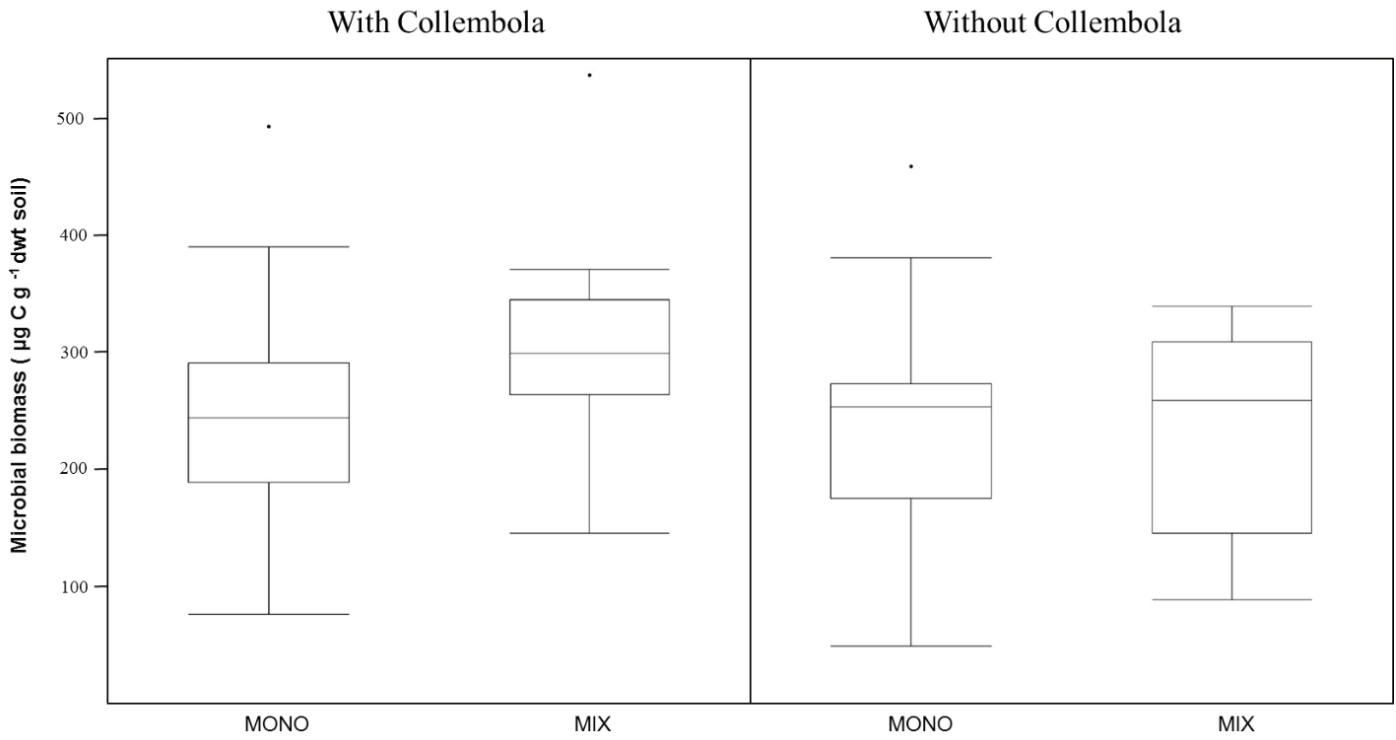

49

50

51 **Figure S3:** Microbial biomass with and without Collembola in monoculture and mixed plant  
52 community. We ran a two-way ANOVA model to analyze whether presence and absence of  
53 Collembola in monoculture and mixed plant community had any effect on microbial biomass  
54 (log-transformed in the analysis). Our results show no significant effect of Collembola (p-  
55 value=0.22, t=1.23), plant community (p-value=0.26, t=1.12) and no interaction effects between  
56 Collembola presence and plant community composition (p-value=0.14, t=1.47). Please note that  
57 we do not have an absolute control of Collembola effect, i.e. “with Collembola” treatment in the  
58 figure above are crossed with predator density. Hence, an absolute effect of Collembola on  
59 microbial biomass could not be tested from our experimental design.

60  
61  
62  
63  
64  
65  
66  
67  
68  
69  
70  
71  
72  
73  
74  
75  
76  
77  
78  
79  
80

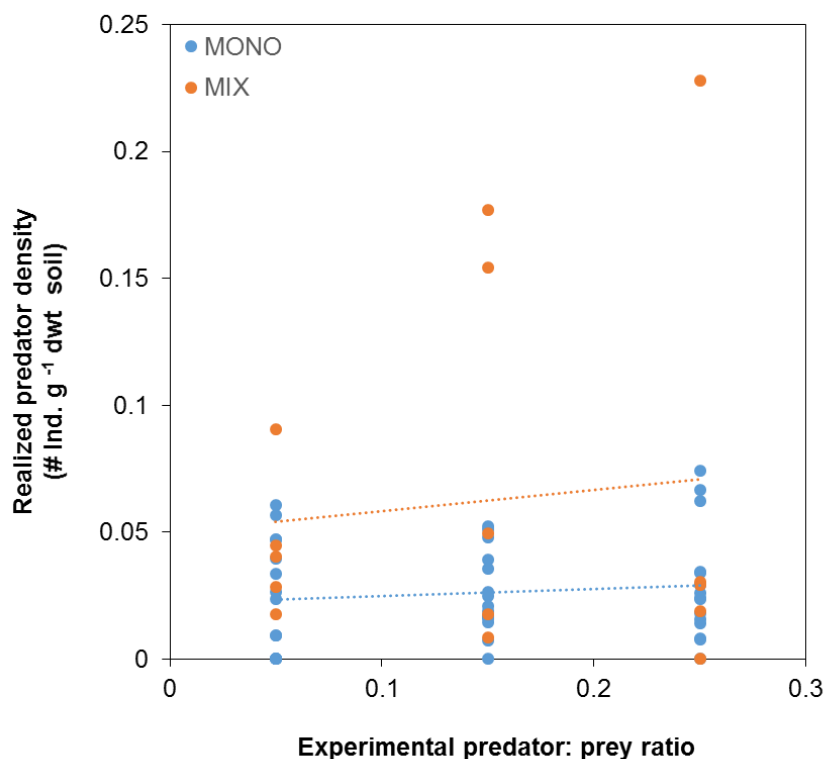

**Figure S4:** Predator density at the final harvest. We only found significant plant community effects on the realized predator density ( $F=4.56$ ,  $P=0.003$ ) using GLMM (negative binomial fit). Initial experimental predator density ( $F=0.73$ ,  $P>0.05$ ) and the interaction between plant community and initial experimental predator density ( $F=0.64$ ,  $P>0.05$ ) both had non-significant effects on the final predator density. Mixture plant communities had 58% higher absolute predator densities than in monoculture plant communities when averaged over all experimental predator density treatments
